# Supplementary material for: Myocardial stretch-induced compliance is abrogated under ischemic conditions and restored by cGMP/PKG-related pathways
Source: Frontiers journal article supplement (doi:10.3389/fphys.2023.1271698), 2023-10-02
Supplement: Data_Sheet_1.pdf [file Data_Sheet_1.pdf]

**Supplementary video. *Experimental myocardial infarction preparation***

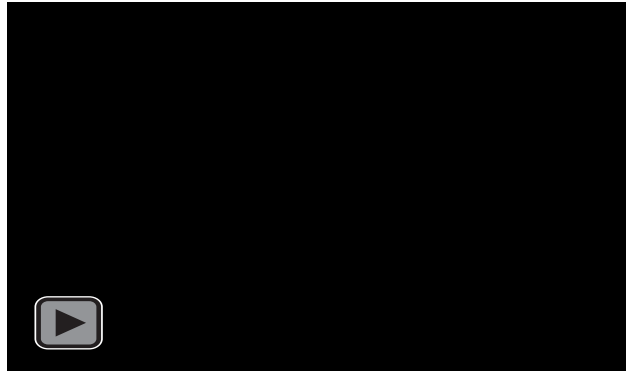

Aortic transit-time flow probe, left ventricular (LV) pressure-volume (PV) and pulmonary artery (PA) catheters are signaled. Both the position of left anterior descending artery ligation by a 6/0 polypropylene suture and the pale dyskinetic area in the anterior LV wall are marked by arrows.

**Supplementary figure. *Electrocardiographic changes upon acute myocardial infarction (MI)***

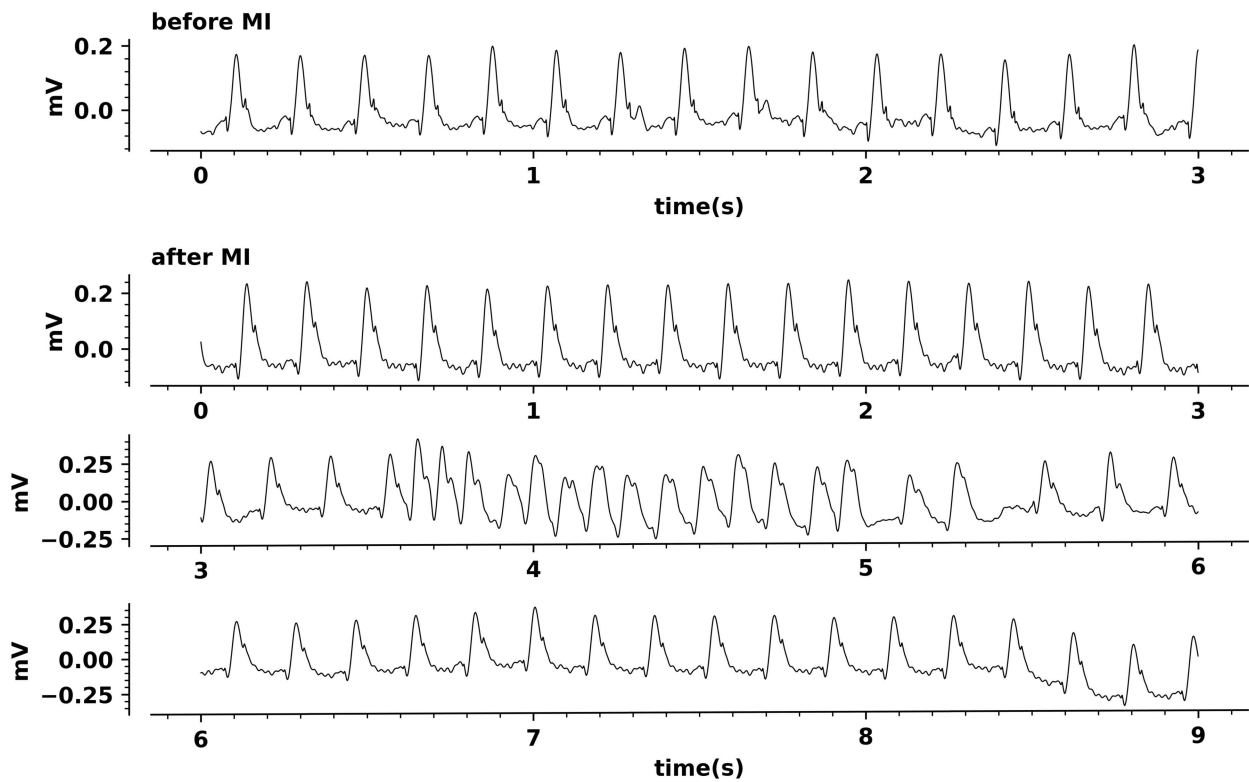

ST-segment elevation is conspicuous after MI. Periods of ventricular arrhythmia were common.
